# Supplementary material
Source: MDPI journal article supplement (https://www.mdpi.com/2220-9964/10/6/384)
Supplement: s1 [file s1]

Table S1. Supporting information for Table 1 including URLs with relevant data sources.

| Topic   | Variable                                                                                                                                | Relevant data sources                                                                                                                                                                                                                                                                                                                                                                                                                                      |
|---------|-----------------------------------------------------------------------------------------------------------------------------------------|------------------------------------------------------------------------------------------------------------------------------------------------------------------------------------------------------------------------------------------------------------------------------------------------------------------------------------------------------------------------------------------------------------------------------------------------------------|
| Climate | WorldClim and Chelsa bioclimatic variables (a set of temperature and rainfall variables specifically developed for ecological modeling) | WorldClim version 2.1 climate data for 1970-2000 [1]<br><a href="https://www.worldclim.org/data/worldclim21.html">https://www.worldclim.org/data/worldclim21.html</a><br><a href="https://chelsa-climate.org/bioclim/">https://chelsa-climate.org/bioclim/</a>                                                                                                                                                                                             |
| Climate | Mean annual precipitation                                                                                                               | WorldClim version 2.1 climate data for 1970-2000 [1]<br><a href="https://www.worldclim.org/data/worldclim21.html">https://www.worldclim.org/data/worldclim21.html</a><br><a href="https://gpm.nasa.gov/missions/trmm">https://gpm.nasa.gov/missions/trmm</a><br><a href="https://chelsa-climate.org/downloads/">https://chelsa-climate.org/downloads/</a><br><a href="https://crudata.uea.ac.uk/cru/data/hrg/">https://crudata.uea.ac.uk/cru/data/hrg/</a> |
| Climate | Potential Evapotranspiration                                                                                                            | <a href="https://lpdaac.usgs.gov/products/mod16a2v006/">https://lpdaac.usgs.gov/products/mod16a2v006/</a>                                                                                                                                                                                                                                                                                                                                                  |
| Climate | Cloud cover                                                                                                                             | <a href="http://www.earthenv.org/cloud">http://www.earthenv.org/cloud</a> [2]                                                                                                                                                                                                                                                                                                                                                                              |

|            |                                                                        |                                                                                                                                                                                                                                                                                                                                                                                                                                                                                                                                                                                                                                                                                                                                                 |
|------------|------------------------------------------------------------------------|-------------------------------------------------------------------------------------------------------------------------------------------------------------------------------------------------------------------------------------------------------------------------------------------------------------------------------------------------------------------------------------------------------------------------------------------------------------------------------------------------------------------------------------------------------------------------------------------------------------------------------------------------------------------------------------------------------------------------------------------------|
| Vegetation | Fire frequency                                                         | <a href="https://cds.climate.copernicus.eu/cdsapp#!/dataset/satellite-fire-burned-area?tab=overview">https://cds.climate.copernicus.eu/cdsapp#!/dataset/satellite-fire-burned-area?tab=overview</a><br><br>[3–5]                                                                                                                                                                                                                                                                                                                                                                                                                                                                                                                                |
| Vegetation | Percentage of woody vegetation cover                                   | MODIS Vegetation Continuous Fields (MOD44B) at 250 m Spatial Resolution ( <a href="https://lpdaac.usgs.gov/products/mod44bv006/">https://lpdaac.usgs.gov/products/mod44bv006/</a> )<br><br><a href="https://land.copernicus.eu/pan-european/high-resolution-layers/forests/tree-cover-density">https://land.copernicus.eu/pan-european/high-resolution-layers/forests/tree-cover-density</a><br><br><a href="https://glad.umd.edu/dataset/global-2010-tree-cover-30-m">https://glad.umd.edu/dataset/global-2010-tree-cover-30-m</a><br><br><a href="https://earthenginepartners.appspot.com/science-2013-global-forest/download_v1.7.html">https://earthenginepartners.appspot.com/science-2013-global-forest/download_v1.7.html</a><br><br>[6] |
| Vegetation | Percentage of grassland cover                                          | MODIS Vegetation Continuous Fields (MOD44B) at 250 m Spatial Resolution ( <a href="https://lpdaac.usgs.gov/products/mod44bv006/">https://lpdaac.usgs.gov/products/mod44bv006/</a> )                                                                                                                                                                                                                                                                                                                                                                                                                                                                                                                                                             |
| Vegetation | Mean of the maximum and minimum Normalized Difference Vegetation Index | MODIS NDVI 16 days composites. Available at <a href="#">250m</a> , <a href="#">500m</a> and <a href="#">1km</a> resolution                                                                                                                                                                                                                                                                                                                                                                                                                                                                                                                                                                                                                      |

|            |                       |                                                                                                                                                                                                                                                                                                                                                                     |
|------------|-----------------------|---------------------------------------------------------------------------------------------------------------------------------------------------------------------------------------------------------------------------------------------------------------------------------------------------------------------------------------------------------------------|
| Vegetation | Leaf Area Index       | <a href="https://land.copernicus.eu/global/products/lai">https://land.copernicus.eu/global/products/lai</a>                                                                                                                                                                                                                                                         |
| Vegetation | Vegetation height     | <a href="https://gedi.umd.edu/data/download/">https://gedi.umd.edu/data/download/</a><br><a href="https://glad.umd.edu/dataset/gedi/">https://glad.umd.edu/dataset/gedi/</a><br><a href="https://catalogue.ceda.ac.uk/uuid/46d70a7636284690882e4ba01cd997c2">https://catalogue.ceda.ac.uk/uuid/46d70a7636284690882e4ba01cd997c2</a>                                 |
| Soil       | Surface Soil Moisture | <a href="https://land.copernicus.eu/global/products/ssm">https://land.copernicus.eu/global/products/ssm</a><br><a href="https://cds.climate.copernicus.eu/cdsapp#!/dataset/satellite-soil-moisture?tab=overview">https://cds.climate.copernicus.eu/cdsapp#!/dataset/satellite-soil-moisture?tab=overview</a>                                                        |
| Soil       | Soil organic carbon   | <a href="https://zenodo.org/record/2525553">https://zenodo.org/record/2525553</a><br><a href="https://data.isric.org/geonetwork/srv/eng/catalog.search#/home">https://data.isric.org/geonetwork/srv/eng/catalog.search#/home</a><br><a href="http://54.229.242.119/GSOCmap/downloads/GSOCmap1.5.0.tif">http://54.229.242.119/GSOCmap/downloads/GSOCmap1.5.0.tif</a> |

|         |                                                                    |                                                                                                                                                                                                                                                                                                                                                                                                                  |
|---------|--------------------------------------------------------------------|------------------------------------------------------------------------------------------------------------------------------------------------------------------------------------------------------------------------------------------------------------------------------------------------------------------------------------------------------------------------------------------------------------------|
| Soil    | Soil texture                                                       | <a href="https://zenodo.org/record/2525817">https://zenodo.org/record/2525817</a><br><br><a href="https://data.isric.org/geonetwork/srv/eng/catalog.search#/home">https://data.isric.org/geonetwork/srv/eng/catalog.search#/home</a>                                                                                                                                                                             |
| Soil    | Soil acidity                                                       | <a href="https://zenodo.org/record/2525664">https://zenodo.org/record/2525664</a><br><br><a href="https://data.isric.org/geonetwork/srv/eng/catalog.search#/home">https://data.isric.org/geonetwork/srv/eng/catalog.search#/home</a>                                                                                                                                                                             |
| Terrain | Slope, elevation and aspect                                        | Can be derived from SRTM ( <a href="https://srtm.csi.cgiar.org/srtmdata/">https://srtm.csi.cgiar.org/srtmdata/</a> ) or GEBCO 500m ( <a href="https://www.gebco.net/data_and_products/gridded_bathymetry_data/gebco_2020/">https://www.gebco.net/data_and_products/gridded_bathymetry_data/gebco_2020/</a> ) or EarthEnv ( <a href="http://www.earthenv.org/topography">http://www.earthenv.org/topography</a> ) |
| Terrain | Modified Topographic Index (can be derived from flow accumulation) | <a href="https://www.hydrosheds.org/downloads">https://www.hydrosheds.org/downloads</a>                                                                                                                                                                                                                                                                                                                          |

|       |                                                                        |                                                                                                                                                                                                                                                                                                                                                                       |
|-------|------------------------------------------------------------------------|-----------------------------------------------------------------------------------------------------------------------------------------------------------------------------------------------------------------------------------------------------------------------------------------------------------------------------------------------------------------------|
| Water | Mean Normalized Difference Water Index.                                | <a href="https://developers.google.com/earth-engine/datasets/catalog/MODIS_MOD09GA_006_NDWI">https://developers.google.com/earth-engine/datasets/catalog/MODIS_MOD09GA_006_NDWI</a><br><a href="https://lpdaac.usgs.gov/products/mod09gav006/">https://lpdaac.usgs.gov/products/mod09gav006/</a>                                                                      |
| Water | Water seasonality                                                      | <a href="https://land.copernicus.eu/global/products/wb">https://land.copernicus.eu/global/products/wb</a><br><a href="https://global-surface-water.appspot.com/download">https://global-surface-water.appspot.com/download</a><br><a href="https://glad.umd.edu/dataset/global-surface-water-dynamics">https://glad.umd.edu/dataset/global-surface-water-dynamics</a> |
| Water | Snow cover fraction or frequency                                       | <a href="https://nsidc.org/data/MOD10A1/versions/6">https://nsidc.org/data/MOD10A1/versions/6</a>                                                                                                                                                                                                                                                                     |
| Water | Snow water equivalent (amount of water contained within the snowpack). | <a href="https://nsidc.org/data/AE_DySno/versions/2">https://nsidc.org/data/AE_DySno/versions/2</a>                                                                                                                                                                                                                                                                   |

|        |                                                                              |                                                                                                                                                                                                                                                                                                                                                                                                                                                                                                                                                                                                                                           |
|--------|------------------------------------------------------------------------------|-------------------------------------------------------------------------------------------------------------------------------------------------------------------------------------------------------------------------------------------------------------------------------------------------------------------------------------------------------------------------------------------------------------------------------------------------------------------------------------------------------------------------------------------------------------------------------------------------------------------------------------------|
| Energy | Land Surface Temperature (LST; a mixture of vegetation and soil temperature) | MODIS Terra Land Surface Temperature:<br><a href="#">1 day</a><br><a href="#">8 days composites</a><br><a href="#">Monthly composites</a><br><a href="https://zenodo.org/record/1435938">https://zenodo.org/record/1435938</a> or [7]<br><a href="https://land.copernicus.eu/global/products/lst">https://land.copernicus.eu/global/products/lst</a><br><a href="https://gpm.nasa.gov/missions/trmm">https://gpm.nasa.gov/missions/trmm</a><br><a href="https://chelsa-climate.org/downloads/">https://chelsa-climate.org/downloads/</a><br><a href="https://crudata.uea.ac.uk/cru/data/hrg/">https://crudata.uea.ac.uk/cru/data/hrg/</a> |
| Energy | Mean solar radiation                                                         | <a href="https://worldclim.org/data/worldclim21.html">https://worldclim.org/data/worldclim21.html</a><br><a href="https://www.ufz.de/gluv/">https://www.ufz.de/gluv/</a>                                                                                                                                                                                                                                                                                                                                                                                                                                                                  |
| Energy | Surface albedo                                                               | <a href="https://land.copernicus.eu/global/products/sa">https://land.copernicus.eu/global/products/sa</a><br><a href="https://nsidc.org/data/MOD10A1/versions/6">https://nsidc.org/data/MOD10A1/versions/6</a>                                                                                                                                                                                                                                                                                                                                                                                                                            |

### Bibliography

1. Fick, S. E.; Hijmans, R. J. WorldClim 2: new 1-km spatial resolution climate surfaces for global land areas. *Int. J. Climatol.* **2017**, *37*, 4302–4315, doi:10.1002/joc.5086.
2. Wilson, A. M.; Jetz, W. Remotely Sensed High-Resolution Global Cloud Dynamics for Predicting Ecosystem and Biodiversity Distributions. *PLoS Biol.* **2016**, *14*, e1002415, doi:10.1371/journal.pbio.1002415.
3. Tansey, K.; Grégoire, J.-M.; Defourny, P.; Leigh, R.; Pekel, J.-F.; van Bogaert, E.; Bartholomé, E. A new, global, multi-annual (2000–2007) burnt area product at 1 km resolution. *Geophys. Res. Lett.* **2008**, *35*, doi:10.1029/2007GL031567.

4. Giglio, L.; Csiszar, I.; Justice, C. O. Global distribution and seasonality of active fires as observed with the Terra and Aqua Moderate Resolution Imaging Spectroradiometer (MODIS) sensors. *J. Geophys. Res.* **2006**, *111*, doi:10.1029/2005JG000142.
5. Carmona-Moreno, C.; Belward, A.; Malingreau, J.-P.; Hartley, A.; Garcia-Alegre, M.; Antonovskiy, M.; Buchshtaber, V.; Pivovarov, V. Characterizing interannual variations in global fire calendar using data from Earth observing satellites. *Glob. Change Biol.* **2005**, *11*, 1537–1555, doi:10.1111/j.1365-2486.2005.01003.x.
6. Hansen, M. C.; Potapov, P. V.; Moore, R.; Hancher, M.; Turubanova, S. A.; Tyukavina, A.; Thau, D.; Stehman, S. V.; Goetz, S. J.; Loveland, T. R.; Kommareddy, A.; Egorov, A.; Chini, L.; Justice, C. O.; Townshend, J. R. G. High-resolution global maps of 21st-century forest cover change. *Science* **2013**, *342*, 850–853, doi:10.1126/science.1244693.
7. Ermida, S. L.; Soares, P.; Mantas, V.; Göttsche, F.-M.; Trigo, I. F. Google Earth Engine Open-Source Code for Land Surface Temperature Estimation from the Landsat Series. *Remote Sens (Basel)* **2020**, *12*, 1471, doi:10.3390/rs12091471.
